# Supplementary material for: BayesR3 enables fast MCMC blocked processing for largescale multi-trait genomic prediction and QTN mapping analysis
Source: PubMed Central journal article supplement (PMC9256732; doi:10.1038/s42003-022-03624-1), 2022-07-05
Supplement: 42003_2022_3624_MOESM3_ESM.pdf [file 42003_2022_3624_MOESM3_ESM.pdf]

## Description of Additional Supplementary Files

**File name:** Supplementary Data 1

**Description:** Data file giving the top 1000 SNPs and other selected genotypes and SNP rankings for various analysis with respect to milk production traits and MIR data

**File name:** Supplementary Data 2

**Description:** The source data behind the manuscript figures

**File name:** Supplementary Software 1

**Description:** R source code for single trait bayesR3
